# Supplementary material for: Anionic surfactant induced mesophase transformation to synthesize highly ordered large-pore mesoporous silica structures
Source: Royal Society of Chemistry journal article supplement (doi:10.1039/b517975k), 2006-01-01
Supplement: b517975k.pdf [file b517975k.pdf]

Electronic Supplementary Information (ESI) for Journal of Materials Chemistry

**Anionic surfactant induced mesophase transformation to synthesize highly  
ordered large-pore mesoporous silica structures**

Dehong Chen, Zheng Li, Ying Wan, Xingjun Tu, Yifeng Shi, Zhenxia Chen, Wei Shen, Bo Tu  
and Dongyuan Zhao\*

Department of Chemistry, Shanghai Key Laboratory of Molecular Catalysis and Innovative Materials,  
Fudan University, Shanghai, 200433, P. R. China

E-mail: dyzhao@fudan.edu.cn Tel: 86-21-6564-2036; Fax: 86-21-6564-1740

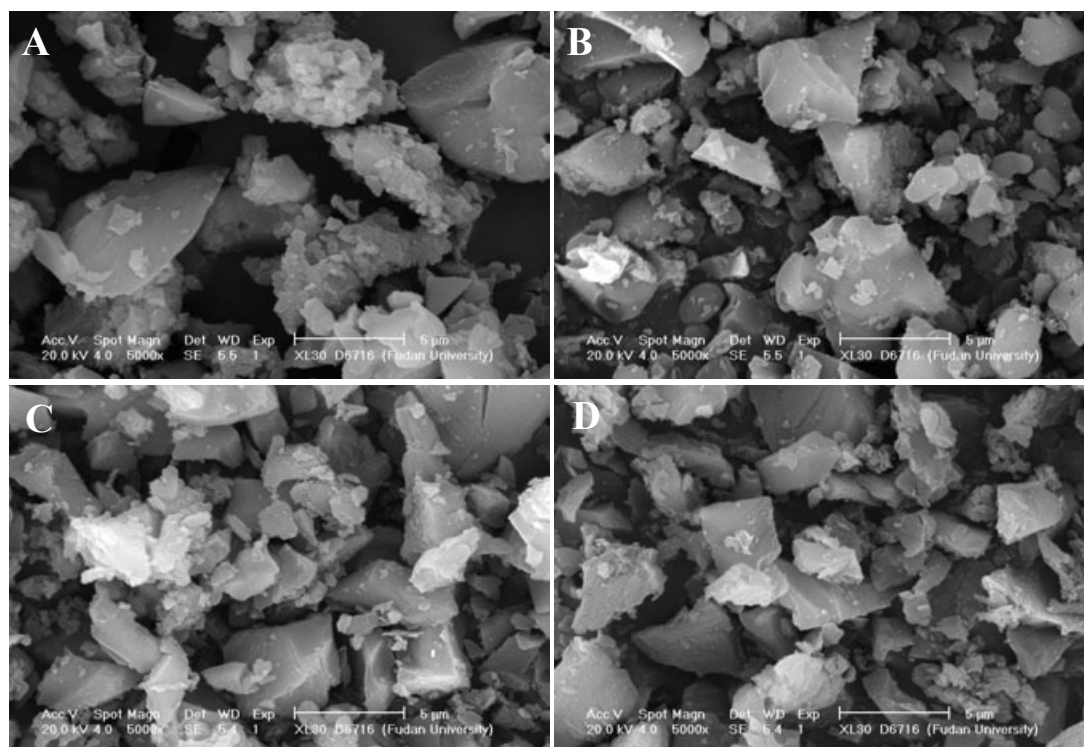

Figure S1. Scanning electron microscopic images for the calcined mesoporous silica materials:

Sample S1 (A), S2 (B), S3 (C) and S8 (D).
